# Supplementary material for: Revealing the effect of crystal size on the high-temperature hydrothermal stability of Cu/SSZ-13 NH3-SCR catalysts
Source: Royal Society of Chemistry journal article supplement (doi:10.1039/d3cy00162h), 2023-01-01
Supplement: d3cy00162h1.pdf [file d3cy00162h1.pdf]

## Supplementary File

Revealing the nature of crystal size on high-temperature hydrothermal stability of Cu/SSZ-13  
NH<sub>3</sub>-SCR catalysts

Huabo Liu <sup>a,#</sup>, Meiqing Shen <sup>a,d</sup>, Chen Wang <sup>c,#</sup>, Jun Wang <sup>a</sup>, Jianqiang Wang <sup>a</sup>, Gurong Shen <sup>b,\*</sup>

<sup>a</sup> School of Chemical Engineering & Technology, Tianjin University, Tianjin, 300072, China

<sup>b</sup> School of Materials Science and Engineering, Tianjin University, Tianjin, 300072, China

<sup>c</sup> School of Environmental and Safety Engineering, North University of China, Taiyuan, 030051,  
China

<sup>d</sup> National Rare Earth Catalysis Research Institute, Shandong, 257000, China

\* To whom correspondence should be addressed:

gr\_shen@tju.edu.cn

# Huabo Liu and Chen Wang contributed equally to this manuscript.

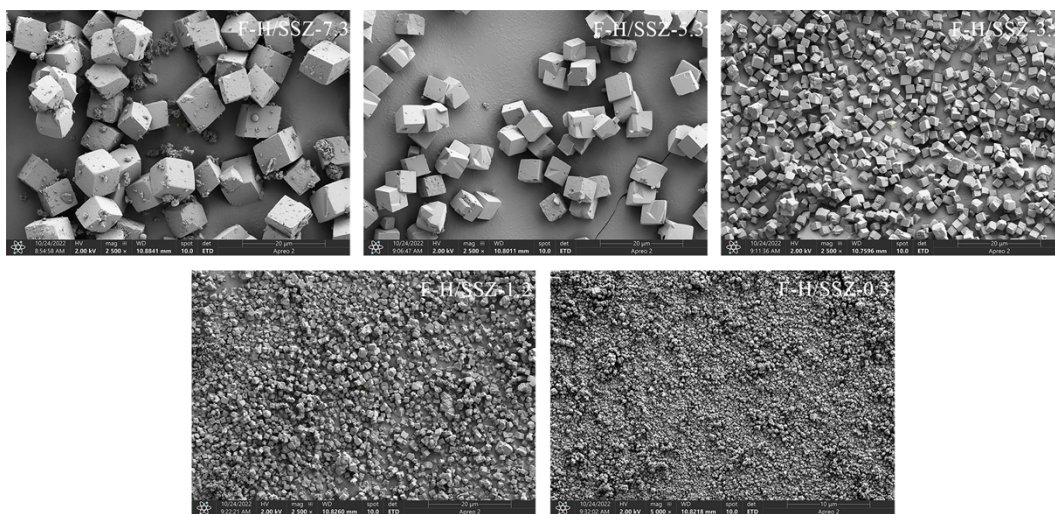

**Figure S1.** SEM images of fresh H-SSZ-13 samples with different crystal size

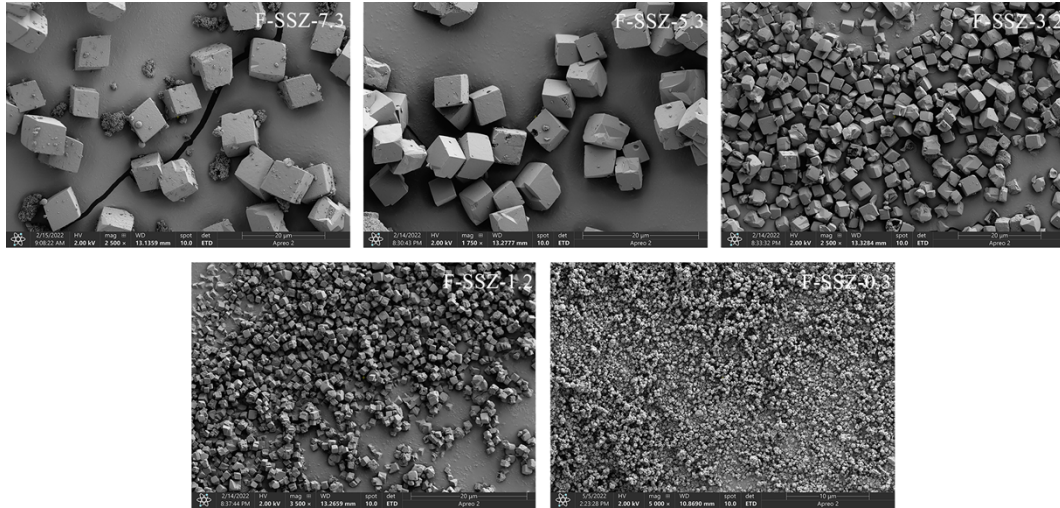

**Figure S2.** SEM images of fresh Cu-SSZ-13 samples with different crystal size

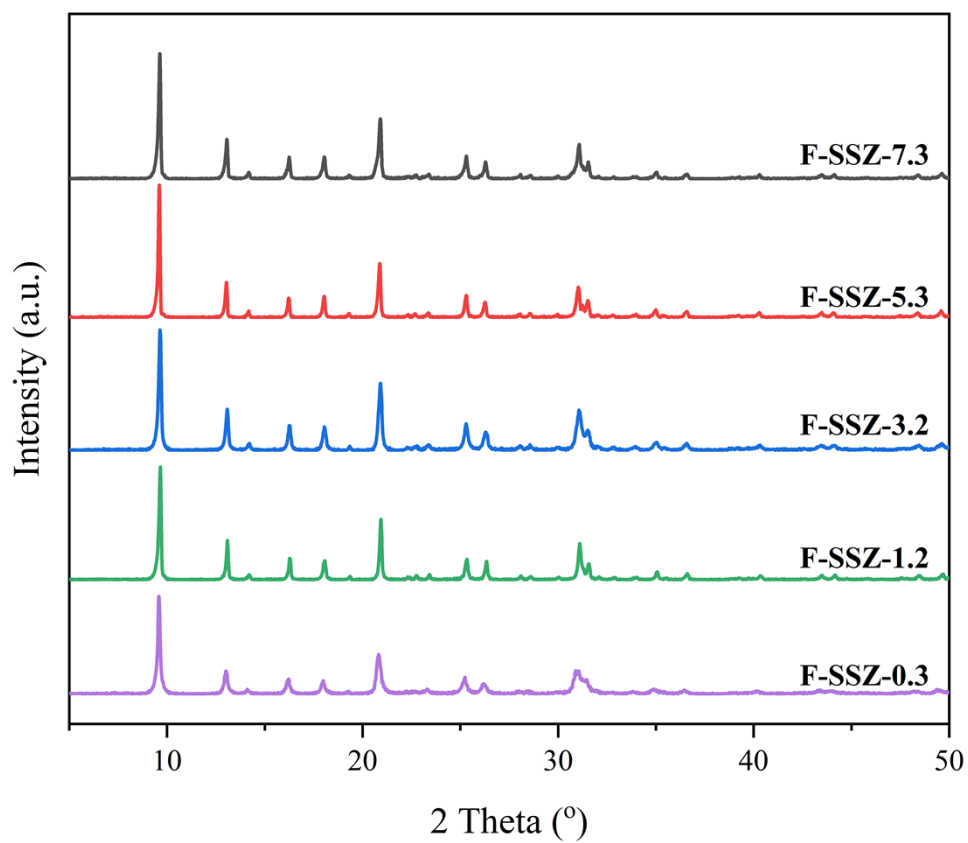

**Figure S3.** XRD patterns of fresh catalysts in the range of 5-50°.

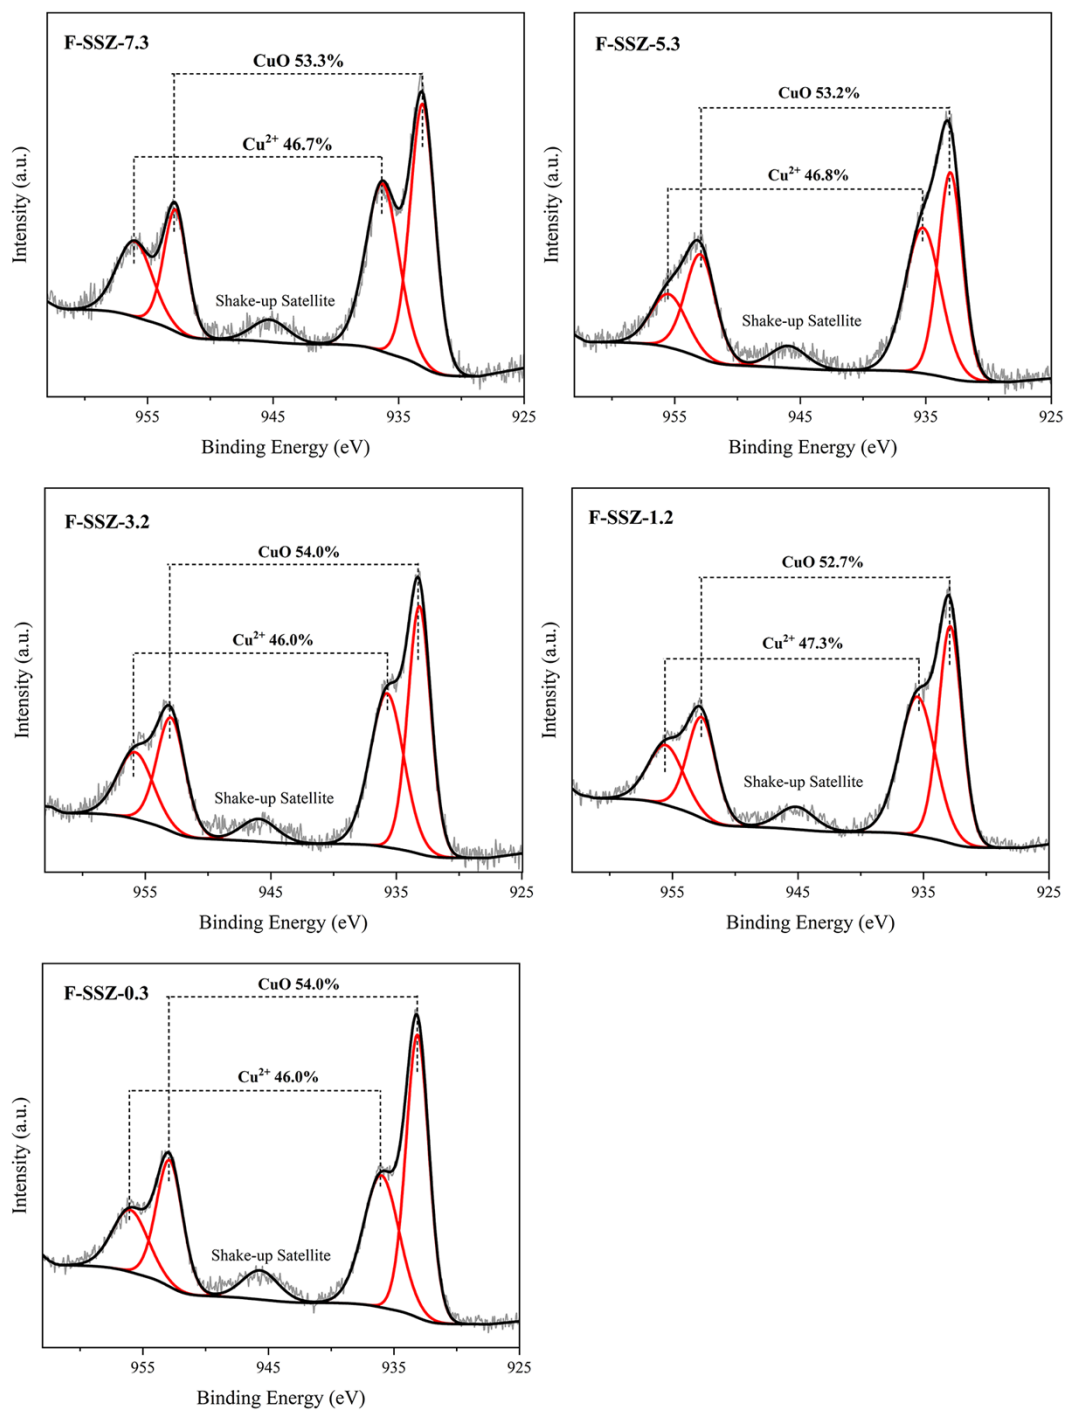

**Figure S4.** The deconvolution curves of Cu 2P XPS spectra for all fresh Cu/SSZ-13 catalysts

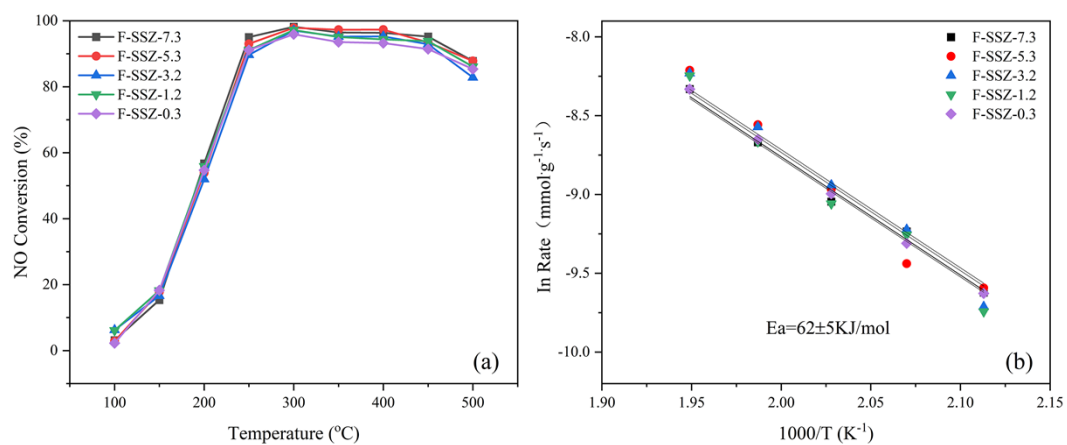

**Figure S5.** (a) Standard NH<sub>3</sub>-SCR performance (500 ppm NO, 500 ppm NH<sub>3</sub>, 5% O<sub>2</sub>, 7% CO<sub>2</sub>, 3% H<sub>2</sub>O balanced with N<sub>2</sub>.) of fresh Cu/SSZ-13 catalysts. (b) SCR rate (500 ppm NO, 500 ppm NH<sub>3</sub>, 5% O<sub>2</sub>, 3% H<sub>2</sub>O balanced with N<sub>2</sub>) of fresh Cu/SSZ-13 catalysts.

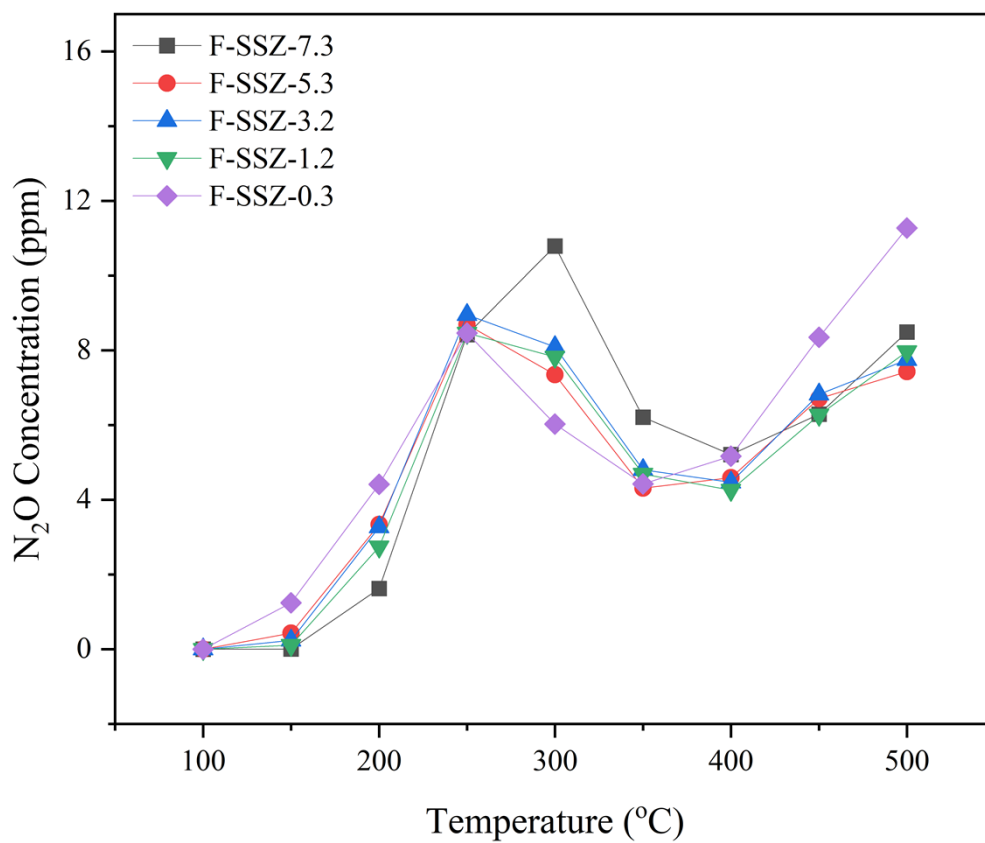

**Figure S6.** N<sub>2</sub>O formation of fresh Cu/SSZ-13 catalysts during standard SCR reaction.

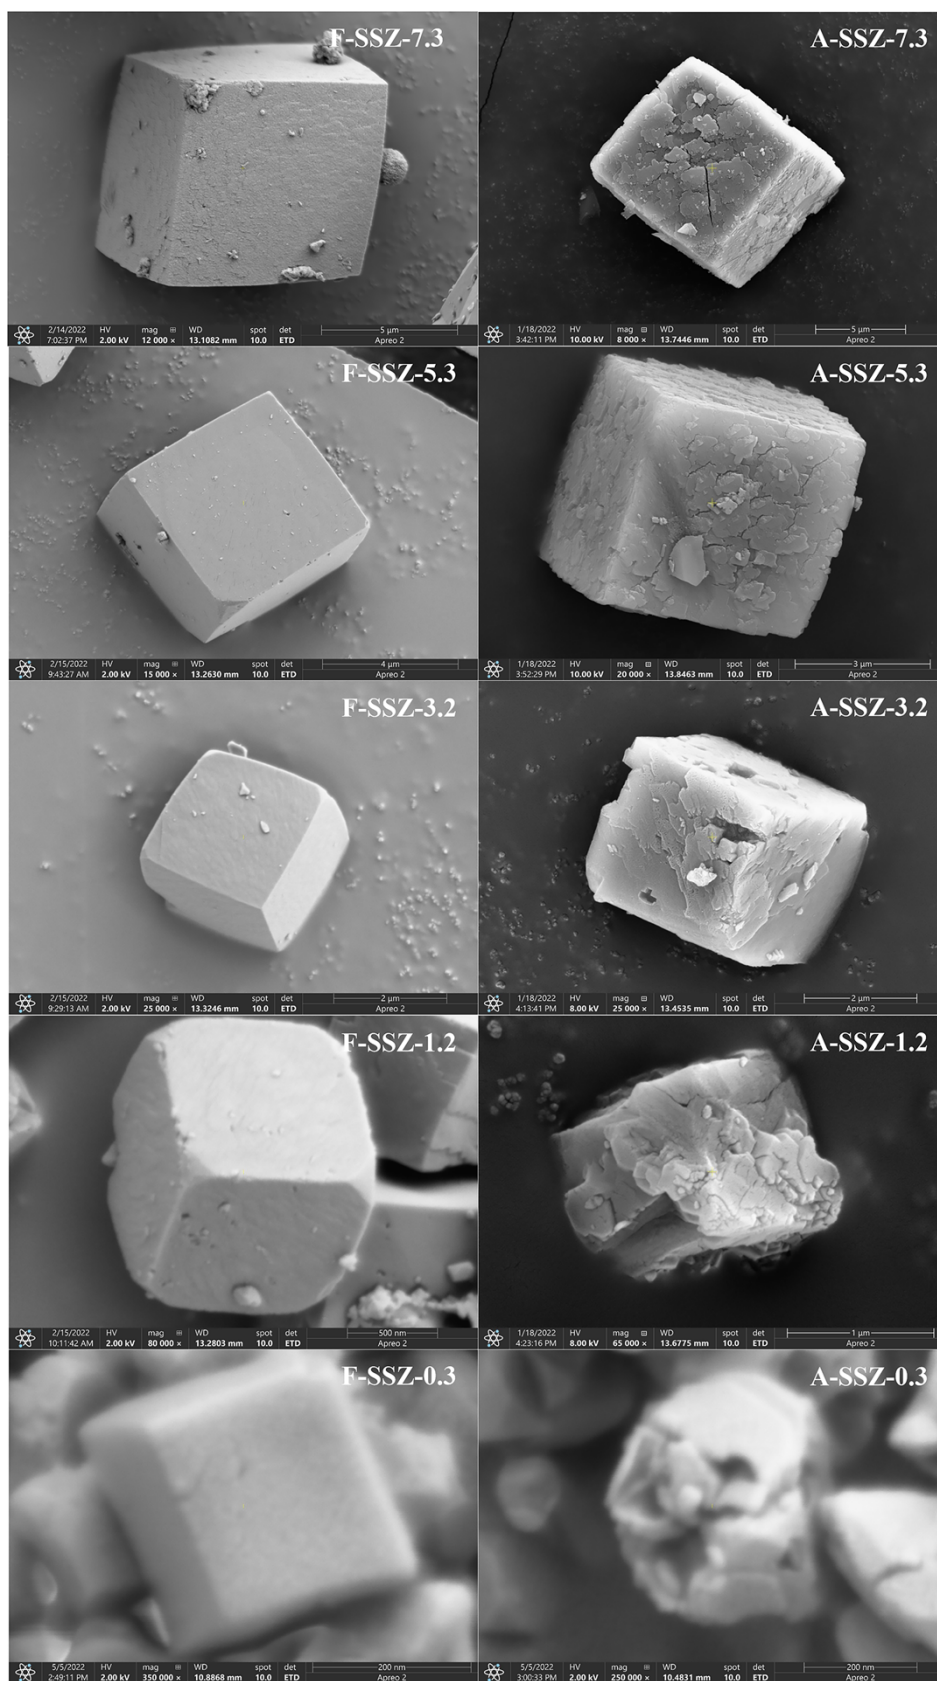

**Figure S7.** Morphology changes of Cu/SSZ-13 with different crystal size before and after high-temperature hydrothermal aging



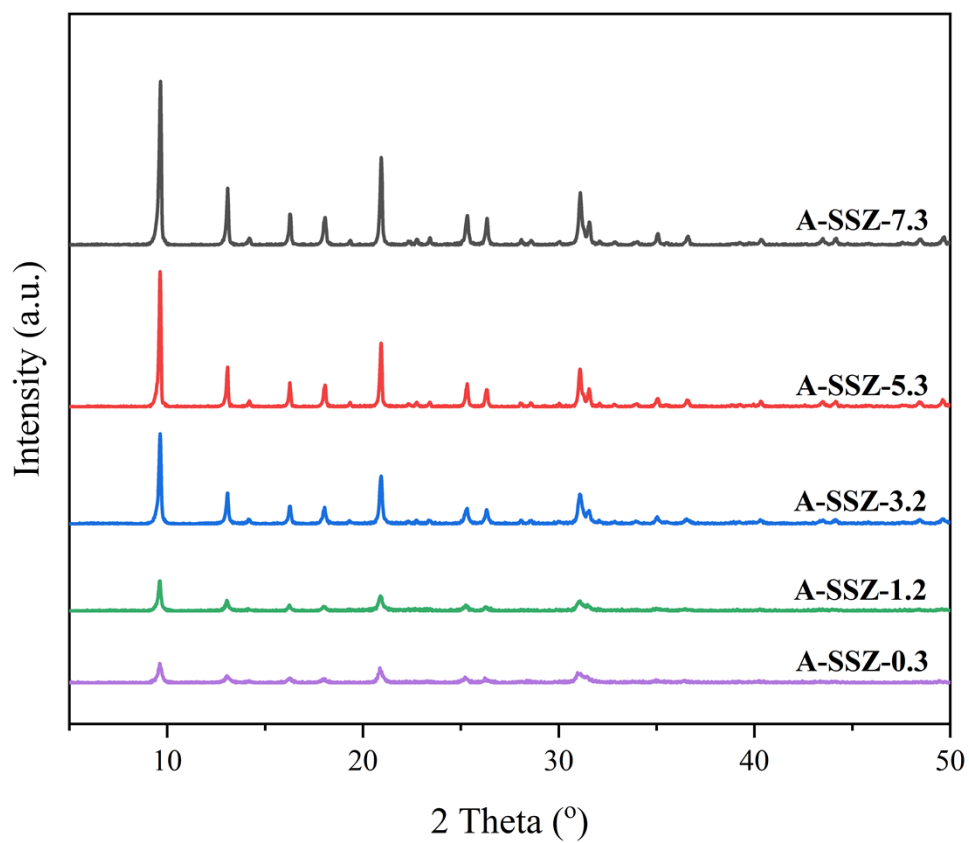

**Figure S8.** XRD patterns of aged catalysts in the range of 5-50°.

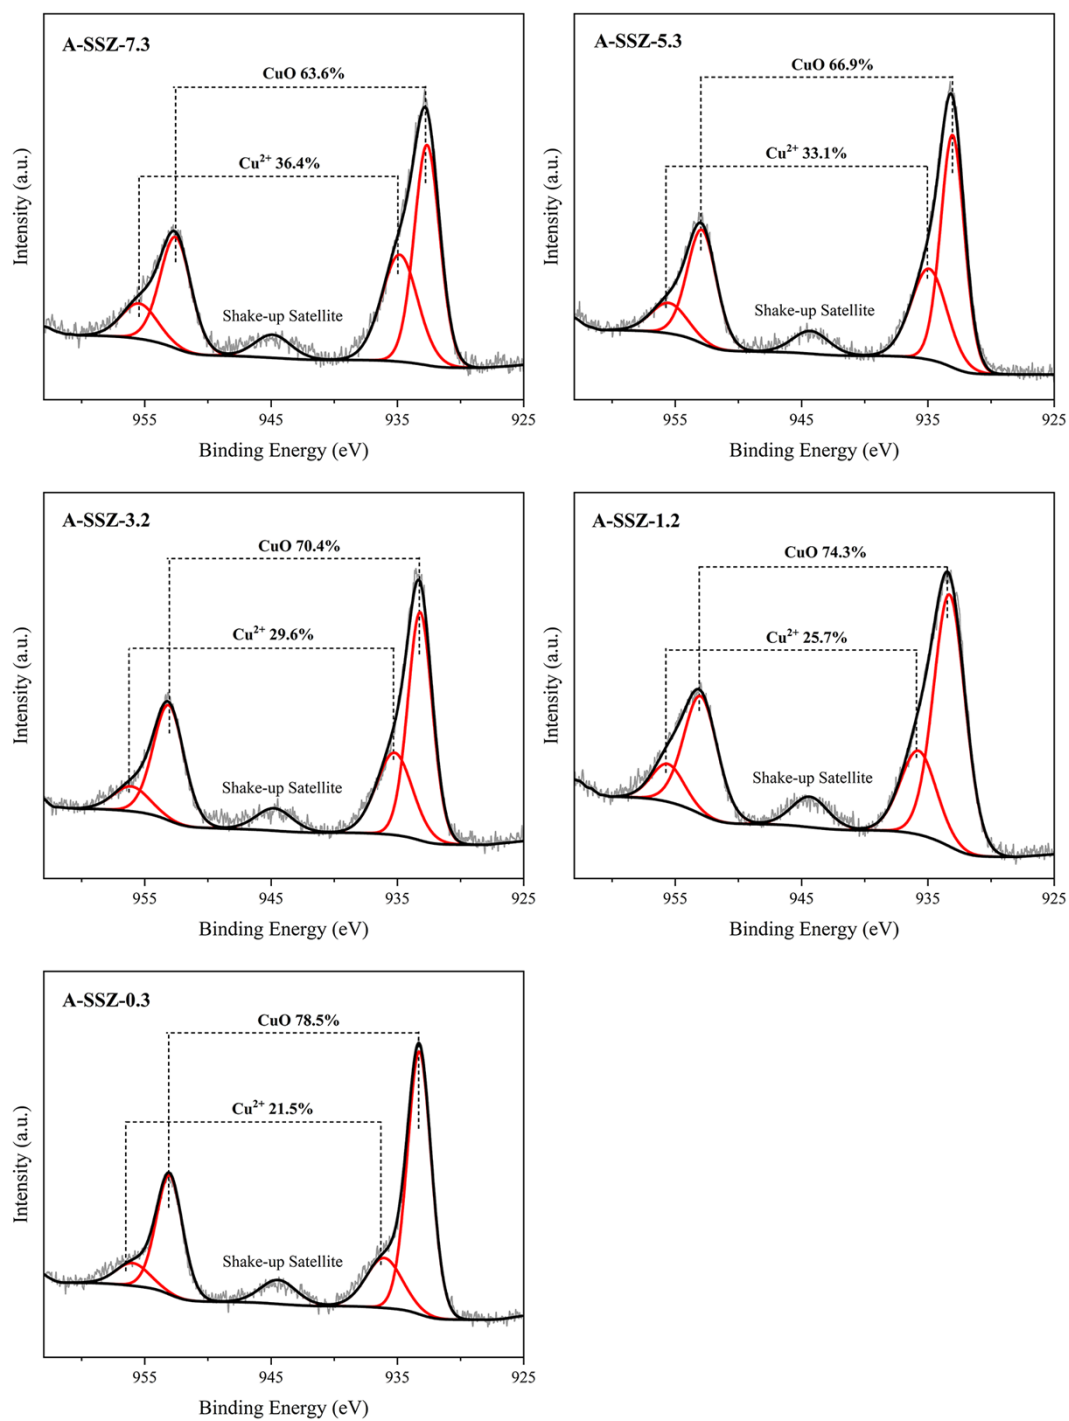

**Figure S9.** The deconvolution curves of Cu 2P XPS spectra for all aged Cu/SSZ-13 catalysts

**Table S1.** Texture properties of Cu/SSZ-13 catalysts

| Sample    | Micropore surface area (m <sup>2</sup> /g) | t-Plot External Surface Area(m <sup>2</sup> /g) | Pore volume (cm <sup>3</sup> /g) | pore size (nm) | BET descending extent (%) |
|-----------|--------------------------------------------|-------------------------------------------------|----------------------------------|----------------|---------------------------|
| F-SSZ-7.3 | 891                                        | 5.1                                             | 0.33                             | 0.383          | /                         |
| F-SSZ-5.3 | 909                                        | 1.5                                             | 0.34                             | 0.386          | /                         |
| F-SSZ-3.2 | 841                                        | 10.1                                            | 0.32                             | 0.387          | /                         |
| F-SSZ-1.2 | 820                                        | 22.2                                            | 0.29                             | 0.382          | /                         |
| F-SSZ-0.3 | 780                                        | 61.9                                            | 0.29                             | 0.388          | /                         |
| A-SSZ-7.3 | 821                                        | 141.8                                           | 0.25                             | 0.389          | 7.9                       |
| A-SSZ-5.3 | 757                                        | 173.8                                           | 0.22                             | 0.387          | 16.7                      |
| A-SSZ-3.2 | 710                                        | 175.2                                           | 0.20                             | 0.385          | 15.6                      |
| A-SSZ-1.2 | 482                                        | 150.9                                           | 0.17                             | 0.389          | 41.9                      |
| A-SSZ-0.3 | 331                                        | 98.1                                            | 0.11                             | 0.384          | 57.1                      |

**Table S2.** NH<sub>3</sub> released at different temperature region of F-H/SSZ-13 samples

| Samples     | Total NH <sub>3</sub><br>storage<br>(mmol/g <sub>catal</sub> ) | Low-temperature<br>region (A)<br><240 °C<br>(mmol/g <sub>catal</sub> ) | High-temperature<br>region (B)<br>>240 °C<br>(mmol/g <sub>catal</sub> ) | A/B   |
|-------------|----------------------------------------------------------------|------------------------------------------------------------------------|-------------------------------------------------------------------------|-------|
| F-H/SSZ-7.3 | 0.470                                                          | 0.042                                                                  | 0.428                                                                   | 0.098 |
| F-H/SSZ-3.2 | 0.491                                                          | 0.075                                                                  | 0.416                                                                   | 0.180 |
| F-H/SSZ-0.3 | 0.533                                                          | 0.135                                                                  | 0.398                                                                   | 0.339 |

**Table S3.** Micropore surface area of H/SSZ-13 catalysts

| Sample      | Micropore surface area<br>(m <sup>2</sup> /g) | BET preservation extent (%) |
|-------------|-----------------------------------------------|-----------------------------|
| F-H/SSZ-7.3 | 808                                           | /                           |
| F-H/SSZ-3.2 | 806                                           | /                           |
| F-H/SSZ-0.3 | 772                                           | /                           |
| A-H/SSZ-7.3 | 786                                           | 97.3                        |
| A-H/SSZ-3.2 | 736                                           | 91.3                        |
| A-H/SSZ-0.3 | 601                                           | 77.8                        |
